# Supplementary material for: Arabidopsis KCS5 and KCS6 Play Redundant Roles in Wax Synthesis
Source: MDPI journal article supplement (doi:10.3390/ijms23084450), 2022-04-18
Supplement: s1 [file s1]

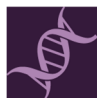

Article

# *Arabidopsis* KCS5 and KCS6 Play Redundant Roles in Wax Synthesis

Haodong Huang <sup>1,†</sup>, Asma Ayaz <sup>1,†</sup>, Minglü Zheng <sup>1</sup>, Xianpeng Yang <sup>2</sup>, Wajid Zaman <sup>3</sup>, Huayan Zhao <sup>1,\*</sup> and Shiyu Lü <sup>1,4,\*</sup>

<sup>1</sup> State Key Laboratory of Biocatalysis and Enzyme Engineering, School of Life Sciences, Hubei University, Wuhan 430062, China; haodonghuang@stu.hubu.edu.cn (H.H.); asmaayaz@bs.qau.edu.pk (A.A.); 202021107010975@stu.hubu.edu.cn (M.Z.)

<sup>2</sup> College of Life Sciences, Shandong Normal University, Jinan 250014, China; yangxp2006@sdu.edu.cn

<sup>3</sup> Department of Life Sciences, Yeungnam University, Gyeongsan 38541, Korea. shangla123@gmail.com

<sup>4</sup> Hubei Hongshan Laboratory, Wuhan, 430070, China

\* Correspondence: huayanzhao@hubu.edu.cn (H.Z.); shiyoulü@hubu.edu.cn (S.L.); Tel.: +86-27-88663882 (S.L.)

† These authors contributed equally to this work.

**Citation:** Huang, H.; Ayaz, A.; Zheng, M.; Yang, X.; Zaman, W.; Zhao, H.; Lü, S. *Arabidopsis* KCS5 and KCS6 Play Redundant Roles in Wax Synthesis. *Int. J. Mol. Sci.* **2022**, *23*, 4450. <https://doi.org/10.3390/ijms23084450>

Academic Editor: Setsuko Komatsu

Received: 14 March 2022

Accepted: 14 April 2022

Published: 18 April 2022

**Publisher's Note:** MDPI stays neutral with regard to jurisdictional claims in published maps and institutional affiliations.

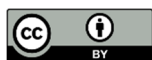

**Copyright:** © 2022 by the authors. Submitted for possible open access publication under the terms and conditions of the Creative Commons Attribution (CC BY) license (<https://creativecommons.org/licenses/by/4.0/>).

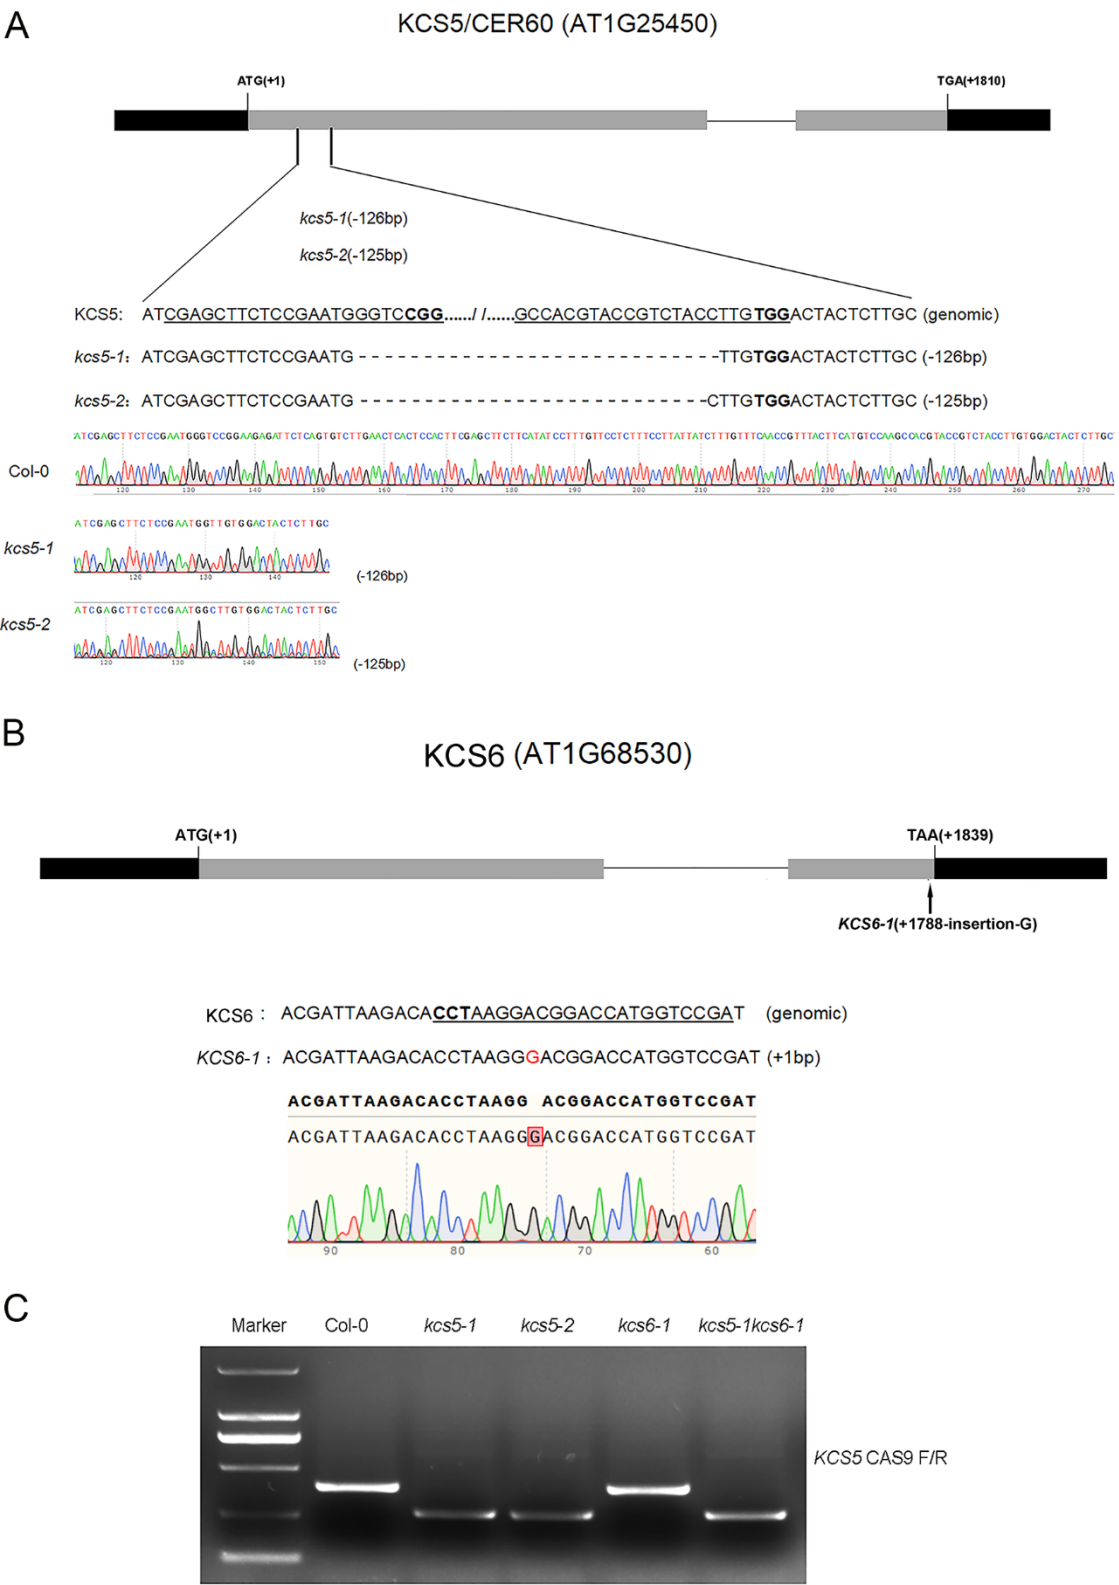

**Figure S1.** Molecular identification of *kcs5-1*, *kcs5-2*, *kcs6-1* and *kcs5-1 kcs6-1*. (**A,B**), *KCS5* and *KCS6* were mutated by CRISPR-Cas9 technology, and the mutation sites were confirmed by sequence. (**C**) The mutations in *kcs5-1*, *kcs5-2*, *kcs6-1* and *kcs5-1 kcs6-1* were identified by PCR.

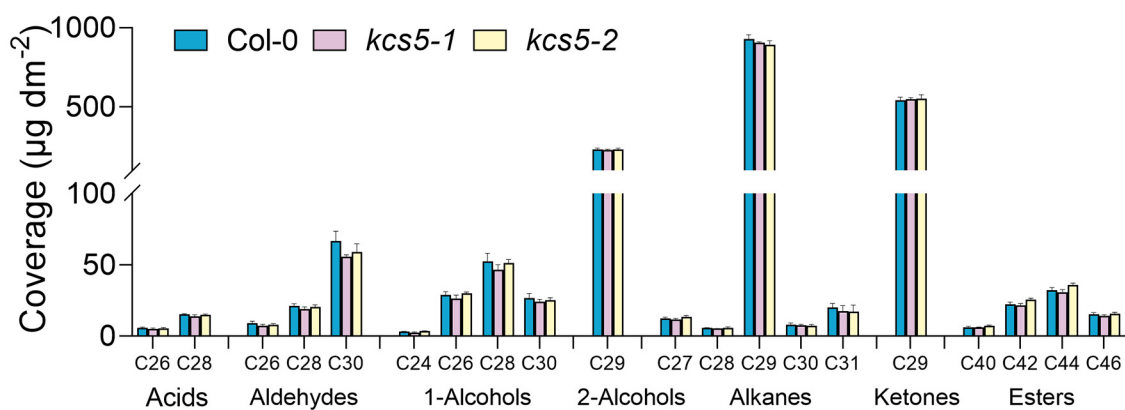

**Figure S2.** Stem wax profiles of Col-0, *kcs5-1* and *kcs5-2*. Wax coverage was expressed as wax amounts per stem surface area ( $\mu\text{g} \times \text{dm}^{-2}$ ). Each wax constituent was designated by carbon chain length and was labelled by chemical class along the x axis. Data are means  $\pm$  SD ( $n = 5$ ).

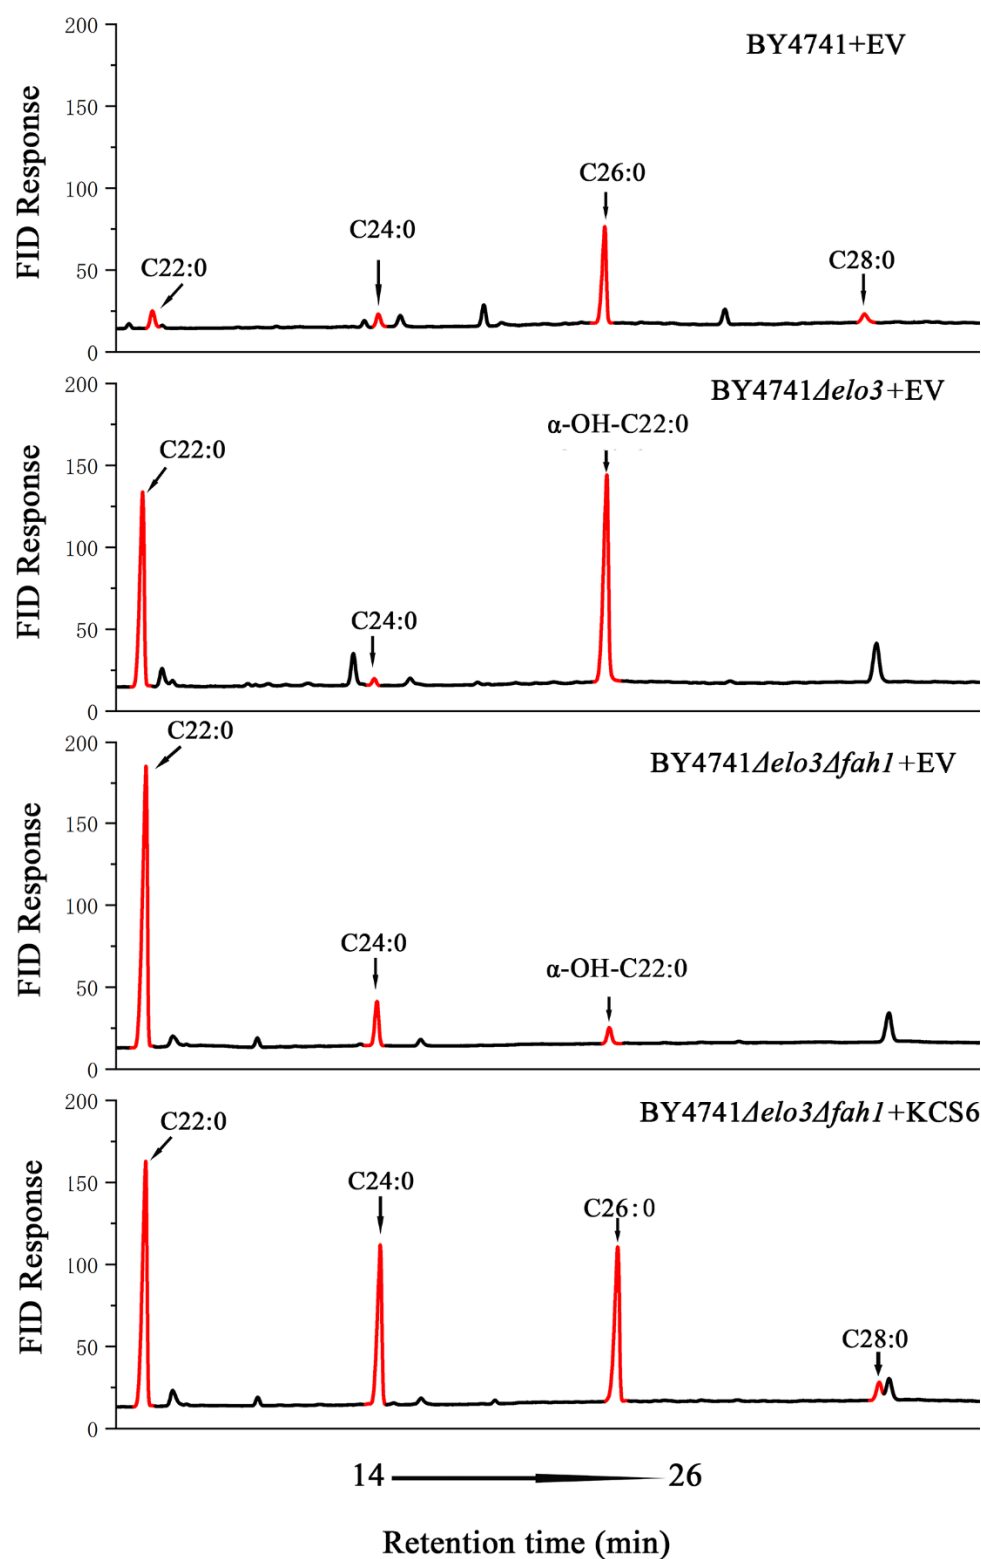

**Figure S3.** Gas chromatograms of yeast VLCFAs. Fatty acids were extracted from BY4741 transformed with empty vector (EV), BY4741 $\Delta$ elo3 transformed with EV, BY4741 $\Delta$ elo3 $\Delta$ fah1 transformed with EV or KCS6, converted to methyl esters, and analyzed by GC-MS. VLCFAs and  $\alpha$ -OH-C22:0 was shown in red peaks.

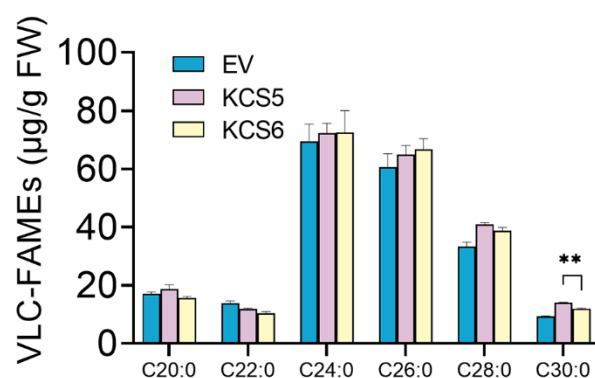

**Figure S4.** Fatty acid analysis in tobacco leaves transformed with Empty vector (EV), KCS5 and KCS6. EV, KCS5 and KCS6 were transiently infiltrated into tobacco leaves. Fatty acid analysis was performed five days after infiltration. The values shown are mean±SD ( $n = 4$ ). \*\* $p < 0.01$ .

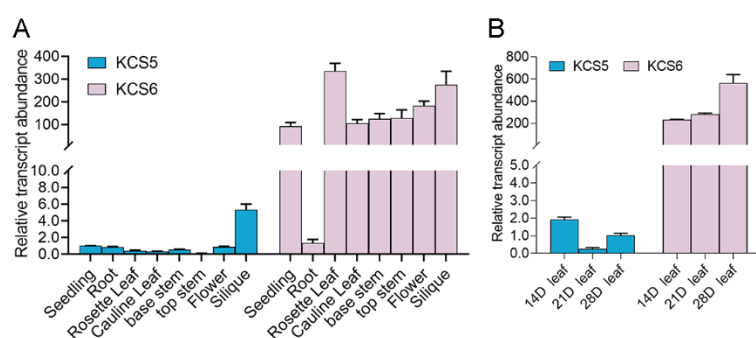

**Figure S5.** Expression patterns of KCS5 and KCS6 in different organs and in response to water deficits.

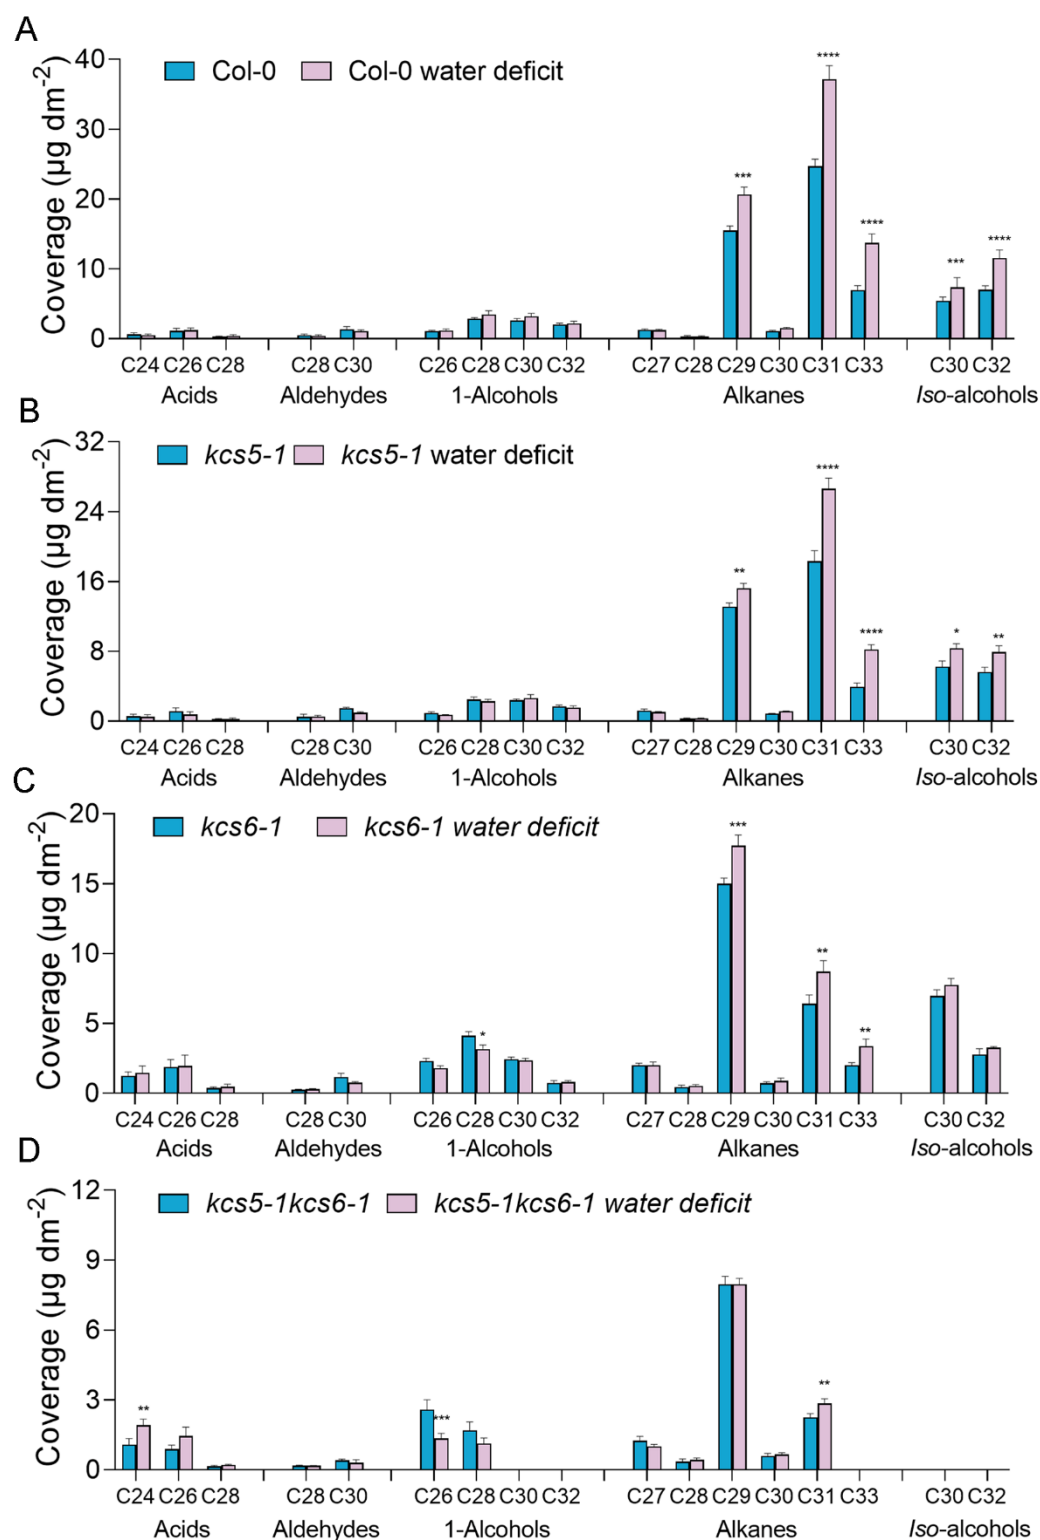

**Figure S6.** Wax profiles of Col-0, *kcs5-1*, *kcs6-1* and *kcs5-1 kcs6-1* rosette leaves under normal and water-deficit conditions. Wax coverage was expressed as wax amounts per leaf surface area ( $\mu\text{g} \times \text{dm}^{-2}$ ). Each wax constituent was designated by carbon chain length and was labelled by chemical class along the x axis. The values shown are mean  $\pm$  SD ( $n = 5$ ). \*  $p < 0.05$ ; \*\*  $p < 0.01$ ; \*\*\*  $p < 0.001$ .

**Table S1.** Cuticular wax composition of rosette leaves, stems and flowers of *Arabidopsis* Col-0, *kcs5-1*, *kcs5-2*, *kcs 6-1* and *kcs5-1 kcs6-1* under normal condition or drought. Values shown are means  $\pm$  SD ( $\mu\text{g}/\text{dm}^2$ ) or ( $\mu\text{g}/\text{mg}$  FW), total wax amounts, and coverage of individual compound classes ( $n = 5$ ). -, Undetectable. The values shown are mean  $\pm$  standard deviation ( $n = 5$ ).

| Sam-<br>ple                                                                  | Total                  | Fatty Ac-<br>ids    | Alde-<br>hydes      | 1-Alcohols            | 2-Alcohol            | Alkanes               | Ketone                | Esters               | iso-Alco-<br>hols   | iso-Al-<br>kanes   |
|------------------------------------------------------------------------------|------------------------|---------------------|---------------------|-----------------------|----------------------|-----------------------|-----------------------|----------------------|---------------------|--------------------|
| <b>Rosette leaves (<math>\mu\text{g}/\text{dm}^2</math>)</b>                 |                        |                     |                     |                       |                      |                       |                       |                      |                     |                    |
| <b>Col-0</b>                                                                 | 74.99<br>$\pm 1.70$    | 2.07<br>$\pm 0.65$  | 1.85<br>$\pm 0.48$  | 8.65<br>$\pm 0.43$    | -                    | 49.98<br>$\pm 0.96$   | -                     | -                    | 12.44<br>$\pm 1.09$ | -                  |
| <b>kcs5-1</b>                                                                | 61.02<br>$\pm 1.23$    | 1.95<br>$\pm 0.69$  | 1.99<br>$\pm 0.37$  | 7.50<br>$\pm 0.52$    | -                    | 37.70<br>$\pm 2.04$   | -                     | -                    | 11.89<br>$\pm 1.14$ | -                  |
| <b>kcs5-2</b>                                                                | 62.22<br>$\pm 1.32$    | 2.78<br>$\pm 0.85$  | 2.38<br>$\pm 0.28$  | 7.66<br>$\pm 0.50$    | -                    | 38.76<br>$\pm 0.87$   | -                     | -                    | 10.64<br>$\pm 1.26$ | -                  |
| <b>kcs6-1</b>                                                                | 51.26<br>$\pm 2.76$    | 3.53<br>$\pm 0.79$  | 1.43<br>$\pm 0.25$  | 9.61<br>$\pm 0.59$    | -                    | 26.58<br>$\pm 0.83$   | -                     | -                    | 10.10<br>$\pm 0.99$ | -                  |
| <b>kcs5-1</b>                                                                | 19.45                  | 2.13                | 0.59                | 4.29                  | -                    | 12.44                 | -                     | -                    | -                   | -                  |
| <b>kcs6-1</b>                                                                | $\pm 0.69$             | $\pm 0.44$          | $\pm 0.07$          | $\pm 0.78$            | -                    | $\pm 0.35$            | -                     | -                    | -                   | -                  |
| <b>Leaves after drought treatment (<math>\mu\text{g}/\text{dm}^2</math>)</b> |                        |                     |                     |                       |                      |                       |                       |                      |                     |                    |
| <b>Col-0</b>                                                                 | 107.46<br>$\pm 1.86$   | 2.18<br>$\pm 0.60$  | 1.53<br>$\pm 0.04$  | 10.18<br>$\pm 1.32$   | -                    | 74.66<br>$\pm 3.59$   | -                     | -                    | 18.91<br>$\pm 2.51$ | -                  |
| <b>kcs5-1</b>                                                                | 78.98<br>$\pm 2.13$    | 1.55<br>$\pm 0.62$  | 1.48<br>$\pm 0.27$  | 7.16<br>$\pm 0.85$    | -                    | 52.53<br>$\pm 2.19$   | -                     | -                    | 16.26<br>$\pm 1.22$ | -                  |
| <b>kcs6-1</b>                                                                | 56.98<br>$\pm 0.94$    | 3.90<br>$\pm 1.41$  | 1.05<br>$\pm 0.10$  | 8.13<br>$\pm 0.53$    | -                    | 33.26<br>$\pm 1.96$   | -                     | -                    | 10.64<br>$\pm 1.04$ | -                  |
| <b>kcs5-1</b>                                                                | 19.51                  | 3.55                | 0.48                | 2.49                  | -                    | 12.94                 | -                     | -                    | -                   | -                  |
| <b>kcs6-1</b>                                                                | $\pm 0.45$             | $\pm 0.69$          | $\pm 0.14$          | $\pm 0.37$            | -                    | $\pm 0.50$            | -                     | -                    | -                   | -                  |
| <b>Stems (<math>\mu\text{g}/\text{dm}^2</math>)</b>                          |                        |                     |                     |                       |                      |                       |                       |                      |                     |                    |
| <b>Col-0</b>                                                                 | 2057.91<br>$\pm 54.54$ | 21.44<br>$\pm 0.48$ | 97.02<br>$\pm 7.63$ | 111.56<br>$\pm 11.38$ | 230.70<br>$\pm 8.10$ | 976.73<br>$\pm 28.70$ | 543.91<br>$\pm 18.06$ | 76.54<br>$\pm 4.97$  | -                   | -                  |
| <b>kcs5-1</b>                                                                | 2000.92<br>$\pm 25.30$ | 18.96<br>$\pm 2.00$ | 82.11<br>$\pm 2.94$ | 100.16<br>$\pm 7.72$  | 228.87<br>$\pm 3.74$ | 949.37<br>$\pm 3.85$  | 548.25<br>$\pm 9.63$  | 73.22<br>$\pm 4.02$  | -                   | -                  |
| <b>kcs5-2</b>                                                                | 2028.35<br>$\pm 66.77$ | 20.61<br>$\pm 0.93$ | 87.95<br>$\pm 6.87$ | 110.70<br>$\pm 4.85$  | 233.11<br>$\pm 6.51$ | 937.25<br>$\pm 30.44$ | 553.84<br>$\pm 22.94$ | 84.89<br>$\pm 3.58$  | -                   | -                  |
| <b>kcs6-1</b>                                                                | 274.91<br>$\pm 2.50$   | 25.96<br>$\pm 0.97$ | 32.83<br>$\pm 4.35$ | 95.57<br>$\pm 7.01$   | 0.60<br>$\pm 0.12$   | 12.71<br>$\pm 2.07$   | 2.70<br>$\pm 0.29$    | 104.55<br>$\pm 7.50$ | -                   | -                  |
| <b>kcs5-1</b>                                                                | 204.68                 | 17.44               | 23.05               | 72.65                 | 0.43                 | 2.91                  | 1.13                  | 87.07                | -                   | -                  |
| <b>kcs6-1</b>                                                                | $\pm 8.45$             | $\pm 1.08$          | $\pm 2.46$          | $\pm 5.05$            | $\pm 0.05$           | $\pm 0.26$            | $\pm 0.17$            | $\pm 3.05$           | -                   | -                  |
| <b>Flowers (<math>\mu\text{g}/\text{mg}</math> FW)</b>                       |                        |                     |                     |                       |                      |                       |                       |                      |                     |                    |
| <b>Col-0</b>                                                                 | 633.49<br>$\pm 26.85$  | 2.99<br>$\pm 0.17$  | 16.36<br>$\pm 0.86$ | 30.16<br>$\pm 2.21$   | 94.98<br>$\pm 4.42$  | 361.01<br>$\pm 14.57$ | 119.77<br>$\pm 5.81$  | -                    | -                   | 8.20<br>$\pm 0.44$ |
| <b>kcs5-1</b>                                                                | 534.38<br>$\pm 13.45$  | 2.52<br>$\pm 0.18$  | 14.05<br>$\pm 0.96$ | 25.69<br>$\pm 1.03$   | 77.84<br>$\pm 1.04$  | 298.89<br>$\pm 9.28$  | 110.71<br>$\pm 2.97$  | -                    | -                   | 4.67<br>$\pm 0.66$ |
| <b>kcs5-2</b>                                                                | 515.79<br>$\pm 10.21$  | 2.65<br>$\pm 0.20$  | 14.36<br>$\pm 0.54$ | 24.69<br>$\pm 0.35$   | 75.17<br>$\pm 1.89$  | 285.73<br>$\pm 6.99$  | 108.28<br>$\pm 2.59$  | -                    | -                   | 4.91<br>$\pm 0.31$ |
| <b>kcs6-1</b>                                                                | 90.49<br>$\pm 1.49$    | 2.90<br>$\pm 0.45$  | 7.30<br>$\pm 0.55$  | 13.22<br>$\pm 0.94$   | 5.28<br>$\pm 0.30$   | 56.35<br>$\pm 1.57$   | 3.91<br>$\pm 0.30$    | -                    | -                   | 1.52<br>$\pm 0.08$ |
| <b>kcs5-1</b>                                                                | 33.16                  | 2.27                | 5.06                | 8.20                  | 2.75                 | 11.78                 | 2.68                  | -                    | -                   | 0.43               |
| <b>kcs6-1</b>                                                                | $\pm 2.37$             | $\pm 0.36$          | $\pm 1.36$          | $\pm 0.34$            | $\pm 0.09$           | $\pm 0.36$            | $\pm 0.04$            | -                    | -                   | $\pm 0.06$         |

**Table S2.** Fatty acids analysis of KCS5, KCS6, KCS5 and CER2, KCS5 and CER26, KCS6 and CER2, KCS6 and CER26 heterologously expressed in yeast ( $\mu\text{g}/\text{OD}600$ ) and tobacco ( $\mu\text{g}/\text{mg}$  FW). The values shown are mean  $\pm$  standard deviation ( $n = 5$ ). -, Undetectable.

| Sample             | C20:0               | C22:0               | C24:0               | C26:0               | C28:0               | C30:0               | C32:0               | C34:0               |
|--------------------|---------------------|---------------------|---------------------|---------------------|---------------------|---------------------|---------------------|---------------------|
| <b>Yeast</b>       |                     |                     |                     |                     |                     |                     |                     |                     |
| EV                 | 1.026<br>$\pm 0.07$ | 6.234<br>$\pm 0.62$ | 0.800<br>$\pm 0.05$ | 0.321<br>$\pm 0.01$ | -                   | -                   | -                   | -                   |
| KCS5               | 1.058<br>$\pm 0.06$ | 3.033<br>$\pm 0.28$ | 1.411<br>$\pm 0.07$ | 2.322<br>$\pm 0.25$ | 0.431<br>$\pm 0.07$ | 0.334<br>$\pm 0.01$ | -                   | -                   |
| KCS6               | 0.901<br>$\pm 0.07$ | 3.448<br>$\pm 0.35$ | 2.210<br>$\pm 0.17$ | 2.319<br>$\pm 0.25$ | 0.289<br>$\pm 0.05$ | 0.160<br>$\pm 0.01$ | -                   | -                   |
| KCS5 CER2          | 0.866<br>$\pm 0.03$ | 2.826<br>$\pm 0.15$ | 1.200<br>$\pm 0.02$ | 2.380<br>$\pm 0.13$ | 0.531<br>$\pm 0.11$ | 0.423<br>$\pm 0.01$ | -                   | -                   |
| KCS6 CER2          | 0.763<br>$\pm 0.06$ | 3.034<br>$\pm 0.26$ | 1.716<br>$\pm 0.09$ | 1.511<br>$\pm 0.09$ | 0.209<br>$\pm 0.03$ | 0.356<br>$\pm 0.01$ | -                   | -                   |
| KCS5 CER26         | 0.698<br>$\pm 0.10$ | 2.002<br>$\pm 0.23$ | 0.911<br>$\pm 0.12$ | 1.786<br>$\pm 0.25$ | 0.207<br>$\pm 0.03$ | 0.195<br>$\pm 0.03$ | 0.248<br>$\pm 0.06$ | 0.131<br>$\pm 0.03$ |
| KCS6 CER26         | 0.687<br>$\pm 0.06$ | 2.724<br>$\pm 0.17$ | 1.722<br>$\pm 0.09$ | 2.137<br>$\pm 0.18$ | 0.221<br>$\pm 0.03$ | 0.192<br>$\pm 0.02$ | 0.144<br>$\pm 0.02$ | 0.194<br>$\pm 0.03$ |
| KCS5 CER2<br>CER26 | 1.031<br>$\pm 0.10$ | 3.148<br>$\pm 0.41$ | 1.202<br>$\pm 0.08$ | 2.209<br>$\pm 0.24$ | 0.347<br>$\pm 0.06$ | 0.588<br>$\pm 0.03$ | 0.380<br>$\pm 0.08$ | 0.258<br>$\pm 0.04$ |
| KCS6 CER2<br>CER26 | 0.842<br>$\pm 0.04$ | 2.767<br>$\pm 0.16$ | 1.463<br>$\pm 0.05$ | 1.964<br>$\pm 0.07$ | 0.276<br>$\pm 0.03$ | 0.293<br>$\pm 0.01$ | 0.216<br>$\pm 0.03$ | 0.263<br>$\pm 0.02$ |
| <b>Tobacco</b>     |                     |                     |                     |                     |                     |                     |                     |                     |
| EV                 | 17.06<br>$\pm 0.70$ | 13.92<br>$\pm 0.74$ | 69.37<br>$\pm 6.02$ | 60.59<br>$\pm 4.69$ | 33.35<br>$\pm 1.46$ | 9.35<br>$\pm 0.20$  | -                   | -                   |
| KCS5               | 18.66<br>$\pm 1.59$ | 11.84<br>$\pm 0.44$ | 72.24<br>$\pm 3.40$ | 64.97<br>$\pm 3.06$ | 40.96<br>$\pm 0.70$ | 14.04<br>$\pm 0.18$ | -                   | -                   |
| KCS6               | 15.60<br>$\pm 0.63$ | 10.41<br>$\pm 0.59$ | 72.55<br>$\pm 7.54$ | 66.79<br>$\pm 3.59$ | 38.74<br>$\pm 1.18$ | 11.97<br>$\pm 0.29$ | -                   | -                   |

**Table S3.** List of primers used in this study.

| Name             | Sequence                                                               | Purpose                                                          |
|------------------|------------------------------------------------------------------------|------------------------------------------------------------------|
| GABI_804G08-LP   | TAACGGTCGATACAATCGGAC                                                  | For genotyping <i>cer6-3</i> T-DNA insertion lines               |
| GABI_804G08-RP   | GTACTCGAGACTTCCCCGAAG                                                  | For genotyping <i>cer6-3</i> T-DNA insertion lines               |
| GABI-pAC161-8409 | ATATTGACCATCATACTCATTGC                                                | T-DNA left-border primer                                         |
| CER6-2-F         | AGAATCCTTGAACGTTCTGGC                                                  | For genotyping <i>cer6-2</i> lines                               |
| CER6-2-R         | GCTAGATCAACTGAGATCAGGC                                                 | For genotyping <i>cer6-2</i> lines                               |
| CER6CAS9-F       | ATTACTATCAAGGCAACGAG                                                   | For genotyping <i>cer6-4</i> crispr-cas9 lines                   |
| CER6CAS9-R       | CAAACCGTTACTAAACCGTT                                                   | For genotyping <i>cer6-4</i> crispr-cas9 lines                   |
| KCS5CAS9-F       | ACACCTCATCATAGGCATAGC                                                  | For genotyping <i>kcs5-1</i> and <i>kcs5-2</i> crispr-cas9 lines |
| KCS5CAS9-R       | TTCGACACTCTTGGGATTGTC                                                  | For genotyping <i>kcs5-1</i> and <i>kcs5-2</i> crispr-cas9 lines |
| CER6-CRISPR-F    | ATATATGGTCTCGATTGGGCTCGCCAC-<br>CGGTCAGACGTTTTAGAGCTAGAAATAGC          | CER6 Crispr-cas9 knockout vector construction                    |
| CER6-CRISPR-R    | ATTATTGGTCTCTAAACAAGGACGGAC-<br>CATGGTCCGCAATCTCTTAGTCGACTCTAC<br>ATA- | CER6 Crispr-cas9 knockout vector construction                    |
| KCS5-CRISPR-F    | TATGGTCTCGATTGGAGCTTCTCCGAATGG<br>GTCGTTTTAGAGCTAGAAATAGC              | KCS5 Crispr-cas9 knockout vector construction                    |
| KCS5-CRISPR-R    | ATTATTGGTCTCTAAACCAAGGTAGACGG-<br>TACGTGGCAATCTCTTAGTCGACTCTAC         | KCS5 Crispr-cas9 knockout vector construction                    |



|               |                                                                    |                                                                           |
|---------------|--------------------------------------------------------------------|---------------------------------------------------------------------------|
| CER6 nLUC-F   | acgggggacgagctcggtacATGCCTCAGGCAC-<br>CGATG                        | CER6 Dual luciferase complementation assay<br>(BiLC) vector construction  |
| CER6 nLUC-R   | cgggacgcgtacgagatctggtcGAGTTT-<br>GACAACTTCGGAATAAAGACAG           | CER6 Dual luciferase complementation assay<br>(BiLC) vector construction  |
| KCS5 nLUC-F   | atacgaacgaaagctctg-<br>caggTCATAGTTTAACAACCTTCAGGGA-<br>TAAAGACAGG | KCS5 Dual luciferase complementation assay (BiLC)<br>vector construction  |
| KCS5 nLUC-R   | cgggacgcgtacgagatctggtcATGTCTGAT-<br>TTCTCGAGCTCCG                 | KCS5 Dual luciferase complementation assay (BiLC)<br>vector construction  |
| CER2-cLUC- F  | acgcgtcccggggcggtacATGGAGGGAAGCCCAG-<br>TGAC                       | CER2 Dual luciferase complementation assay<br>(BiLC) vector construction  |
| CER2-cLUC -R  | atacgaacgaaagctctgcaggTTATA-<br>TAATCATATTAGTCACCTCCTCCTTGAG       | CER2 Dual luciferase complementation assay (BiLC)<br>vector construction  |
| CER26-cLUC- F | acgcgtcccggggcggtacATGGGTCGATCTCAA-<br>GAACAGGGAC                  | CER26 Dual luciferase complementation assay<br>(BiLC) vector construction |
| CER26-cLUC-R  | atacgaacgaaagctctg-<br>caggTCATGGCGCGATCAAACCAAACCTTC              | CER26 Dual luciferase complementation assay<br>(BiLC) vector construction |
| KCS5-P42X- F  | cgacggattctagaactagtATGTCTGAT-<br>TTCTCGAGCTCCG                    | KCS5 Yeast heterologous expression vector con-<br>struction               |
| KCS5-P42X -R  | aactaattacatgactcgag-<br>TCATAGTTTAACAACCTTCAGGGATAAAGA-<br>CAGG   | KCS5 Yeast heterologous expression vector con-<br>struction               |
| CER6-P42X- F  | cgacggattctagaactagtATGCCTCAGGCAC-<br>CGATG                        | CER6 Yeast heterologous expression vector con-<br>struction               |
| CER6-P42X -R  | aactaattacatgactcgagTTAGAGTTT-<br>GACAACTTCGGAATAAAG               | CER6 Yeast heterologous expression vector con-<br>struction               |
| CER2-P42X- F  | cgacggattctagaactagtATGGAGGGAAGCCCAG-<br>TGAC                      | CER2 Yeast heterologous expression vector con-<br>struction               |
| CER2-P42X -R  | aactaattacatgactcgagTTATATAATCATATTAG-<br>TCACCTCCTCCTTGAG         | CER2 Yeast heterologous expression vector con-<br>struction               |
| CER26-P42X- F | cgacggattctagaactagtATGGGTCGATCTCAA-<br>GAACAGGGAC                 | CER26 Yeast heterologous expression vector con-<br>struction              |
| CER26-P42X-R  | aactaattacatgactcgagTCATGGCGCGATCAAAC-<br>CAAACCTTC                | CER26 Yeast heterologous expression vector con-<br>struction              |
| KCS5-qRT-F    | AAGCGAGAGAAAGAGCGTTG                                               | qRT-PCR, KCS5 (AT1G25450)                                                 |
| KCS5-qRT-R    | TGCCTATGATGAGGTGTGGA                                               | qRT-PCR, KCS5 (AT1G25450)                                                 |
| CER6-qRT-F    | GTGAAGCCCTCAAGGCAAAC                                               | qRT-PCR, CER6 (AT1G68530)                                                 |
| CER6-qRT-R    | CGAAGGCCAGCTTGAAATCC                                               | qRT-PCR, CER6 (AT1G68530)                                                 |
| KCS5 RT-F     | TCTCCCATCTGCCAACTTTC                                               | RT-PCR KCS5 (AT1G25450)                                                   |
| KCS5 RT-R     | TCGCTCGAGGATTCTCATTT                                               | RT-PCR KCS5 (AT1G25450)                                                   |
| ACTIN2-qRT-F  | GCACCCTGTTCTTCTTACCGA                                              | qRT-PCR (AT3G18780)                                                       |
| ACTIN2-qRT-F  | CTTGATGGCGACATACATAGC                                              | qRT-PCR (AT3G18780)                                                       |
| ACTIN2-F      | GTTGGTGATGAAGCACAATCCAAG                                           | RT-PCR (AT3G18780)                                                        |
| ACTIN2-R      | CTGGAACAAGACTTCTGGGCATCT                                           | RT-PCR (AT3G18780)                                                        |
